# Supplementary material for: Analysis of genetic diversity and discrimination of Oil Palm DxP populations based on the origins of pisifera elite parents
Source: PubMed Central journal article supplement — Breed Sci. 2021 Apr 2;71(2):134–43. doi: 10.1270/jsbbs.20043 (PMC8329876; doi:10.1270/jsbbs.20043), 2021-04-02
Supplement: 71_134_s1.pdf [file 71_134_s1.pdf]

**Supplemental Table 1. Haplotypes estimation with respect to the alleles scoring**

**A) Total haplotypes per each SSR marker**

| <b>SSR marker</b> | <b>Alleles/Patterns</b> | <b>Total Haplotypes</b> | <b>SSR marker</b>  | <b>Alleles/Patterns</b> | <b>Total Haplotypes</b> |
|-------------------|-------------------------|-------------------------|--------------------|-------------------------|-------------------------|
| <b>CIR3328</b>    | <b>1 2 3 4 5 6 7 8</b>  |                         | <b>CIR3693</b>     | <b>1 2 3 4 5 6</b>      |                         |
|                   | 1 0 0 0 0 0 0 1         |                         |                    | 0 0 1 0 0 0             |                         |
|                   | 0 0 0 1 0 0 0 1         |                         |                    | 0 0 1 0 1 0             |                         |
|                   | 1 0 0 1 0 0 0 0         |                         |                    | 0 0 0 0 1 0             |                         |
|                   | 0 0 0 0 0 0 1 1         |                         |                    | 0 0 0 0 0 1             |                         |
|                   | 0 0 0 1 0 0 1 0         |                         |                    | 1 0 0 0 0 1             |                         |
|                   | 0 0 0 0 0 0 0 1         |                         |                    | 1 0 0 0 0 0             |                         |
|                   | 1 0 0 0 0 0 0 0         |                         |                    | 0 0 0 1 0 0             |                         |
|                   | 1 0 0 0 0 1 0 0         |                         |                    | 0 0 0 1 1 0             |                         |
|                   | 1 0 1 0 0 0 0 0         |                         |                    | 0 1 0 0 0 0             |                         |
|                   | 0 0 1 0 0 1 0 0         |                         |                    | 0 0 0 1 0 1             |                         |
|                   | 0 0 0 0 0 1 0 0         |                         | 0 0 0 0 1 1        | <b>11</b>               |                         |
|                   | 1 0 0 0 1 0 0 0         |                         | <b>CIR2569</b>     |                         |                         |
|                   | 0 0 1 0 1 0 0 0         |                         | <b>1 2 3 4 5 6</b> |                         |                         |
|                   | 0 0 1 0 0 0 0 0         |                         | 0 0 0 1 0 1        |                         |                         |
|                   | 0 0 0 0 1 0 0 0         |                         | 0 0 0 1 0 0        |                         |                         |
|                   | 0 0 0 1 1 0 0 0         |                         | 0 0 0 0 0 1        |                         |                         |
|                   | 0 0 0 1 0 0 0 0         |                         | 0 0 0 0 1 1        |                         |                         |
|                   | 0 1 0 0 0 0 0 0         |                         | 0 0 1 1 0 0        |                         |                         |
|                   | 0 0 0 0 1 0 1 0         |                         | 1 0 0 1 0 0        |                         |                         |
|                   | 0 1 0 0 1 0 0 0         |                         | 1 0 0 0 0 1        |                         |                         |
| 0 0 0 0 0 0 1 0   | <b>21</b>               | 0 0 0 0 0 0             |                    |                         |                         |
| <b>CIR3362</b>    |                         |                         | 0 1 0 0 1 0        |                         |                         |
| <b>1 2 3 4 5</b>  |                         | 0 1 0 0 0 0             |                    |                         |                         |
| 1 0 0 0 0         |                         | 0 0 0 0 1 0             |                    |                         |                         |
| 1 0 1 0 0         |                         | 0 0 0 1 1 0             | <b>12</b>          |                         |                         |
| 0 0 0 0 0         |                         | <b>CIR0788</b>          |                    |                         |                         |
| 0 0 1 1 0         |                         | <b>1 2 3 4 5 6</b>      |                    |                         |                         |
| 1 0 0 1 0         |                         | 0 1 0 0 1 0             |                    |                         |                         |
| 0 1 0 0 0         |                         | 0 0 0 0 1 0             |                    |                         |                         |
| 0 1 1 0 0         |                         | 0 1 1 0 0 0             |                    |                         |                         |
| 1 1 0 0 0         |                         | 0 0 1 0 1 0             |                    |                         |                         |
| 0 1 0 1 0         |                         | 0 1 0 0 0 0             |                    |                         |                         |
| 0 0 1 0 0         |                         | 0 0 1 0 0 0             |                    |                         |                         |
| 0 0 0 1 0         | <b>11</b>               | 0 0 0 0 0 0             |                    |                         |                         |

**CIR3382****1 2 3 4 5**

00100

00101

00001

00010

10010

00110

00011

01010

01001

10100

10000

01000

11000

01100

14

**CIR2600****1 2 3 4 5 6 7**

0100001

0000010

0000011

0000001

0100000

0100010

0010000

0010001

0010010

0000000

1000000

0000110

1000010

0010100

0000100

0001000

0001100

17

**CIR2427****1 2 3 4 5 6**

001010

000011

000010

001000

000000

100010

101000

100001

000011

001100

100100

100000

000100

001001

16

**CIR0894****1 2 3 4 5**

10000

00001

10100

00000

00101

10001

01000

01010

00010

10010

00011

01001

11000

13

**CIR2422****1 2 3 4 5**

10000

10010

11000

01010

10100

00100

10001

7

**CIR3683****1 2 3 4 5 6 7**

0000100

0000101

1000100

0000110

0100100

0100001

001001  
 000001  
 100001  
 101000  
 100000  
 010100  
 000110  
 000100  
 010010  
 110000  
 100010

16

**CIR3785**

**1 2 3 4**  
 0011  
 0010  
 0001  
 0101  
 1001  
 1010  
 1000  
 0000

8

**CIR3607**

**1 2 3 4 5 6 7 8**  
 01000010  
 01100000  
 00100010  
 01000000  
 00100000  
 00000010  
 10100000  
 00000000  
 10000010  
 10000000  
 00100100  
 00000100  
 00001000  
 00001010  
 00101000  
 00010000  
 10010000  
 00000001  
 10000001

19

0001000  
 0001100  
 0100000  
 0010000  
 0010100

11

**CIR3544**

**1 2 3 4 5 6 7**  
 0000010  
 0000110  
 0000100  
 0001000  
 0001100  
 0100100  
 0100000  
 1100000  
 0000000  
 0000001  
 0010001  
 0010000  
 0101000

13

**CIR3775**

**1 2 3 4 5**  
 00010  
 00001  
 00101  
 00110  
 00100  
 10000  
 10010  
 00011  
 00000  
 01010  
 01000

11

**CIR3428**

**1 2 3 4**  
 0001  
 1001  
 0101  
 0011  
 0010  
 0100

6

| <b>CIR0802</b>         | <b>CIR3533</b>   |
|------------------------|------------------|
| <b>1 2 3 4 5 6 7 8</b> | <b>1 2 3 4 5</b> |
| 1 0 0 0 0 0 1 0        | 1 0 0 0 0        |
| 1 0 0 0 1 0 0 0        | 0 0 0 0 0        |
| 0 0 0 0 0 0 1 0        | 0 0 1 0 0        |
| 1 0 0 0 0 0 0 0        | 0 0 0 1 0        |
| 0 0 0 0 1 0 1 0        | 1 0 1 0 0        |
| 0 0 0 0 1 0 0 0        | 1 0 0 1 0        |
| 0 0 0 0 0 0 0 1        | 0 0 1 1 0        |
| 0 0 0 1 0 0 0 1        | 0 1 0 0 0        |
| 0 1 0 1 0 0 0 0        | 0 1 0 1 0        |
| 0 1 0 0 0 0 0 1        | 0 1 0 0 1        |
| 0 0 0 1 0 0 0 0        | 0 0 0 0 1        |
| 0 0 1 0 0 0 0 0        | 0 0 0 1 1        |
| 0 1 0 0 0 0 0 0        |                  |
| 0 0 0 0 0 0 0 0        |                  |
| 0 1 0 0 0 1 0 0        |                  |
| 0 0 0 0 0 1 0 0        |                  |
|                        | <b>CIR3392</b>   |
|                        | <b>1 2 3</b>     |
|                        | 0 1 0            |
|                        | 1 0 0            |
|                        | 1 1 0            |
|                        | 0 1 1            |
|                        | 0 0 1            |
|                        | 1 0 1            |
| <b>16</b>              | <b>12</b>        |
|                        | <b>6</b>         |

**Fragment patterns detected: 240**



0000101101000010100101001000000011000100010010000000010000010000000110110000000001001100000001010000010100001 (1)  
23

10001000000100010101000010010000100000010100100000000110000101010000101000010001010001000000101010000010100010 (1)  
24

000010110000001010010100100000001100010001001000000001000001000000011010000000001001100000101010000010100101 (1)  
25

10001000000100110101000010000000100000010100100000000100000101000000101100000001010001000001000100000010000110 (1)  
26

00001000000100010101000010010000110000000100000010000110000101010000000100000010000010000000001000000100010 (1)  
27

00001000000100010101010010000000100000010000100000101010000101100000001000001000000000100000010100010 (1)  
28

10001000000100110101010010010000100000010000100010000110000100010000000100010000001001100000101010000000100110 (1)  
29

0000100000010001010101001001000011000001000010001000011000010101000010110000000100000100000101010000010100010 (1)  
30

0000100000010011010101001001000010000001000010001000011000010101000010000001000100000100000101010000010100010 (1)  
31

0000100100010011010100001000000010000001000000110000110000101010000001000010001010001000010000100000010100110 (1)  
32

1000100100010001010101001001000010000001000010010000011000010101000010100001000101000000001010100000010100010 (1)  
33

0000100100010001010100001000000011000001000010010000010000010001000000100001000010000100001000000010000010 (1)  
34

100010000001000101010100100000001000000100001001000001100001000100000001100000001010001000001000100000010000010 (1)  
35

100010000001001101010100100000001100000100001001000001100001000100000001100000001010001000001000100000010000010 (1)  
36

00001001000100110101000010000000110000010000100010000110000101010000101000010001010001000010000100000010100010 (1)  
37

1000100000010011010100101000000011000001010000001000011000010001000000010000100001000010000100000010100100 (1)  
38

0000101100000010100001101001000011000100010010000000010000010000000110110000000001001100000001010000010100101 (1)  
39

00001011000000101001000010010000110001000100100000000100000100000001001000000000010011000000011100000010100101 (1)  
40

00001011000000101001000010000000110001000100100000000100000100000001001000000000010011000001001100000010100101 (1)  
41

000010110000001110010000100100001100010001001000000001000001000000001011000000001001100000001010000010100001 (1)  
42

0000101100010011010001101001000011000001000010010000011000010001000000100001000011000001001100000010100110 (1)  
43

10001001000100010101000010010000110000010000000010000100000101010000101000010001010011000001001100000010100110 (1)  
44

00001011000100010101000010010000110000010000100010000110000100010000101000010000010011000001001100000010100110 (1)  
45

10001001000100010101000010010000110000010000000110000100000100010000001000010001010011000001001100000010100110 (1)  
46

00001010010100010101000010010000110000010000100100000100000101010000101000010001000011000001001100000010100110 (1)  
47

10001001000100010101000010010100110000010000100100000100000101010000101000010000010011000001001100000010100110 (1)  
48

00001001000100010101000010010100110000000000000110000100000100010000001000010001010011000001001100000010100110 (1)  
49

10001001000100110101001010010000110000010000100010000110000100010000101000010000010011000001001100000010100110 (1)  
50

00001011000100110101010010010000100000010100000000000110000101010000001000000001010011000001001100000010100100 (1)  
51

10001001000100110101000010010000110000010000000110000100000101010000101000010001010011000000001100000010100010 (1)  
52

000011001000000111010000100100101100000101000010000010000010001000100010000000000100100000100000000001000010 (1)  
53

0000100010100001011000001000001011000100010000100000100000100010001010100000000001001000001001001000001000010 (1)  
54

0000110010000001011100101000001011000100010000100000100000110001000001010000000001100010001001001000001000010 (1)  
55

0000100010100001011100001000001011000100010100000000100000100010001010100000100001101000001000001000001000010 (1)  
56

000010001010000101010000100100101100000101010000000010000010000001010100000100001100010001000001000001000010 (1)  
57

00001000001001011000000100100001100000001010000000110000010001000101010000000001001000001000001000001000010 (1)  
58

000010001000000101110010100100001100010001010000000010000110001000100000000100001100010001000001000001000010 (1)  
59

00001000100000010101000010000010110000010100001000001100001100010001010000010100001101000001000001000001000010 (1)  
60

0000110010100001011100001000001011000100010100000000100001100010001010000001000010010000001001001000001000010 (1)  
61

0000100100100001011100001000000110001000100001000001100000100010000010000010100001100010001000001000001000010 (1)  
62

0000110010100001011100001000000110000010101000000010000010001000001000000100001100010001001001000001000010 (1)  
63

000011010000000101110000100000101100010001000010000011000001000100010100000001000010010001001001000001000010 (1)  
64

000011001010000110010010100000011000001010100000001100000100010001010000010100001001000001000001000001000010 (1)  
65

00001101000000010100011010000010110000010100001000001000000100010000010000010100001100010001000001000001000010 (1)  
66

0000110010100001011100101000001011000100010000010000010001000001000000100001001000001000001001001000010 (1)  
67

000010000011001110010000100100001000000101000000000100000010001000001000001010000110000100100000000010000010 (1)  
68

00001000100100111101000010000010100000010101000000001000000100010001000000100000010000100010000010000010 (1)  
69

0000100000100011110100101001000011000001000100100000100000010000001010000010000001100010001000001000001000010 (1)  
70

00001000001000110101001010010000110000010101000000001000000100010001010000010000001000010001000001000010000010 (1)  
71

00001000100000110101000010010000110000010100001000001100000100010001000000010000001000010001000001000010000010 (1)  
72

00001000100100110101001010010000110000010100000000001000000100000001010000010000001000011001000001000001000010 (1)  
73

00001000001000110101000010010000110000010101000000001000000100010001010000010100000000011001000001000001000010 (1)  
74

00001000100000110101000010000001011000001010000100000100000010001000000000010100000100001001000001000001000010 (1)  
75

00001100100100110100100010010000100000010100001000000100000100010000010000010000001000000001001001000010000010 (1)  
76

00001000100100010010110010010010100001010000001000000100000100010000010000010000001000010001001000010000010 (1)  
77

00001100101000010010100010010000100000010000001000001000100000010000010000001000010001001000010000010 (1)  
78

00001000100100010110110010010000100001010100001000000100000100010001010000010000001000000001001001000010000010 (1)  
79

00001000100100010011100010010010100001010101000000000100000100010000010000010000001000010001001000010000010 (1)  
80

0000110100100011001010001001000010000101010100000000100000010001000101010000000001001010001001000010000010 (1)  
81

00001100100000010010101010010000110000010101000000000100000100010000010000010000001001010001001000010000010 (1)  
82

00001100100100010010110010010000110000010101000000001100000100010000010000010000001000010001001000010000010 (1)  
83

00001000100100011010101010010000110000010000001000000100000100010000010000010000001001000001001000010000010 (1)  
84

00001100100100011000110010010000110000010000001000001000000100010001010000010000001001010001001000010000010 (1)  
85

00001100100101011010100010010000110000010101000000001000001100010001010000010000001000010001001000010000010 (1)  
86

00001000100000111010011010010000100000010000001000001000001100010000010000010000001001010001000001000010000010 (1)  
87

00001000100100011000010010010000110000010000001000001100001100010000010000010000001000010001000000100010000010 (1)  
88

00001000100100111000011010010000100001010000001000001100000100010001010000010000001001010001000101000010000010 (1)  
89



00001000100100111000010010010000100000010100001000001000000100010000000000100000010000100010000001000100000010 (1)  
90

00001000100000111000011010010000100001010100001000001100000100000010100000100000010010000001001000001000000100000010000001000000100000010 (1)  
91

000010001001001110000100100100001100000101010000000011000001000100010100000100000010000100010010010000110000010 (1)  
92

00001100100000111000010010010000110000010101000000001000001000100000100000100000010010100010011001000100000010 (1)  
93

00001100100000111000010010010010100001010100001000001000010000100000100000100000010010100010000010000110000010 (1)  
94

000011001010001110000100100100001100000100010010000001000001000100010100000100000010010100010011001000100000010 (1)  
95

000011001010001110000110100100001100000101000010000001000001000100010100000100000010000100010010010000110000010 (1)  
96

00001000001000111000011010010000110000010101000000001000001000100010100000100000010000100010010011000110000010 (1)  
97

000010001010001110000100100100101100010001000010000001000001000100000100000100000100001000100010000100000010 (1)  
98

00001100100000111000010010010000110001000101000000001000001000100000100000100000010010100010011010000110000010 (1)  
99

000011001000010100100100100100001000010101010000000011000001000100010100000100000010010100010000001000110000010 (1)  
100

00001100101000110010011010010000110001000001001000001000000100010001010100000000010010100010000011000100000010 (1)  
101

0000100010000011001001001001001010000100010100000000110000010001000000000100000010010100010000010000100000010 (1)  
102

00001001100000011001000010000001000000011000100000001001001000000011001001000000100011000000100100000011000010 (1)  
103

000010011000000110010000100000010000000110001000000010010010000000110010000000100011000000100100000011000010 (1)  
104

000010010000000110010100110000011000000011000100000001001001000010000100001100010000010100001000011000010 (1)  
105

0000100100000011100100001000000100000001100010000000100100100000001100000100000010001100000010010000001110000 (1)  
106

010010010000000110010100110000011000100011000100000001001001000010001001000100000101010000010100100000011000010 (1)  
107

010010010000000110010100110000011010100001000100000001000001000000001000000100000010100100000010000000011000010 (1)  
108

0100100100000001100101001100000110101000010001000000010000010000100010010001000000101010000010100101000011000010 (1)  
109

00001001000000011001010000101000110100000110001000000010000010100100010010001000011000110000010100001000001000010 (1)  
110

00001011000000011001000010000000100000001100010000000100000100000001100100100000100001100000001000000011000010 (2)  
111 114

01001001000000011000010001010001001000001100010000000100100001001000100100010000010001100001010000100000100010 (1)  
112

0000100100000100110010100010100011010000011000100000001001000010010001001000100000110001100001000000100001100010 (1)  
113

00001011000000011001000010000000100000001100010000000100000100000001100100100000100001100000000010000001100010 (1)  
115

00001011000000011001000010000000100000001100010000000100000100000001100100100000010001100000010010000001100010 (2)  
116 119

000010110000010011001000010010000100000001100010000000100000100000001100100100000100001100000010010000001100010 (1)  
117

01001001000000011000000001010001101000001100000000000100100001001000100000100000010101000001010000100001100010 (1)  
118

00001011000000011001000010000000100000001100010000000100000100000001100100000000010001100000010010000001100010 (1)  
120

0000100100000001010010000100000001000000001001010000000100000100000001000100000000110001100000010010000001100010 (1)  
121

000010110000000101001010010000001000000001001010000000100000100000001000100100000110001100000010010000001100010 (1)  
122

0000101100000001010010000100000001000000001001010000000100000100000001000100100000110001100000010010000001100010 (1)  
123

0000101100000001010010000100000001000000001001010000000100000100000001000100100000110001100000010010000001100010 (1)  
124

0000101100000001010010000100000001000000001001010000000100000100000001000100100000110001100000010010000001100010 (2)  
125 127

0000101100000001010010000100000001000000001001010000000100000100000001000000100000110001100000010010000001100010 (1)  
126

000010110000000101001000010000000100000000100101000000010000010000000100000000000100001100000010010000001100010 (1)  
128

0000101100000001010010000100000001000000001001010000000100000100000001000000100000110001100000010010000001100010 (1)  
129

000010110000000101001000011000001000000001001010000000100000100000001000100100000010001100000010010000001100010 (1)  
130

0000101100000001010010000100000001000000001001010000000100000100000001000100100000010001100000010010000001100010 (1)  
131

00001001000000010100100001000000100001000000010000010000000100000100000001000100100000010001100000010010000001110010 (1)  
132

000010110000000111001000010000001000010000000100000100000001000001000000010001000001010010100001100010 (1)  
133

0000100100000001010000100110000011000100000010000000100100100001000001000100100000010100000001010000100101000010 (1)  
134

00001001000000011100001001100000100000000100001000010000000010000100010000000100001100000010010100000100010 (1)  
135

000010010000000101000010011000001000010000000100000001001000000101000000101000001001010000010 (1)  
136

000010010000001010000100110000010000100000010000001001000001010000010001001000000101000000100000100010100101000010 (1)  
137

0000100100000010100001001100000100001000000100100000101000001000100100000110100000001010000100100100010 (1)  
138

0000101100000010100001001100000100001000000010000100000100100001000100000100001100000010010100000110000 (1)  
139

000010110000001010000100110000010000000010000100001000001000010001000100000100001100001010010100000110000 (1)  
140

0000101100000010100001001100000100000000100001000010000000100001000100000000010000000000110000 (1)  
141

000010110000001010000100110000011000100010010000001001000001010010001001001000001001000000100101010000 (1)  
142

000010010000001010010100100100010010000001001010000000100000101001001000100000000110001100001000000100100110010 (1)  
143

00001001000000101001010001010001001000000100000101001001000100000000110001100001000000100100110010 (1)  
144

0000100100000010100101001001000100100000010000010100100100000000000110001100001000000100100110010 (2)  
145 147

0000100100000010100101000101000100100000010000010100100100000000000110001100001000000100100110010 (1)  
146

0000100100000010100101001000000100100000010000010100100100000000000110001100001000000100100110010 (1)  
148

0000100100000010100101000101000100100000010000010000100100000000000110001100001000000100100110010 (3)  
149 150 151

010000110000100110000100100100010010000001000000100000001000000100000110000100001000010100100110010 (1)  
152

000010010001101010000010100100100001000000001100011000000010110000000100000001000001001000100010000010 (1)  
153

00001001000110101001001010000010000100000001100001000000010000001100100000000001000100100001001010000011 (1)  
154

0000100100011010100010101000001000010000000110000100000001000000110010000000000100010000100000101010000011 (1)  
155

0000100100011010100010101001001000010000000110000100000001000000110010000000000100010000100000101010000010 (1)  
156

00001001000110101000101010010010000100000001100001000000010000001100100000000001000100001001001010000010 (1)  
157

0000100100011010100010101001001000010000000110000100000001000000110010000000000100000001000000101010000010 (1)  
158

0000100100011010100010101000100001000000011000010000000100100000010000000001000100001000101010000010 (1)  
159

0000100000010010100100101001001000010000000110000100000001011000000100000000001000100001001001010000010 (1)  
160

000010010001100010000001001001000010000000110000000000000010000001000000000010001000000000101010000010 (1)  
161

0000100100011000100010101001001000010000000110000100000000011000000100000000001000100101000000101010000010 (1)  
162

000010010001100010001010100100100001000000001100001000000000110000100100000000010001001000000010100000010 (1)  
163

000010010001101010010010100000100001000000001000001000000001011000010010000000000100010000100000010100000010 (1)  
164

000010010001001010001010100000100001000000001000001000000001011000010010000000001000100001000000101010000010 (1)  
165

000010010001001010001010101000100001000000001000001000000001011000000100000001000000100001000000101010000010 (3)  
166 167 168

0000100100010010100010101001001000010000000010000010000000010110000001000000010000000100001000000101010000010 (1)  
169

0000100100010010100010101000001000010000000010000010000000010110000001000000010000000100001000000101010000010 (1)  
170

0000100000001010100010101001001000010000000010000010000000010110000001000000010000000100001000000101010000010 (1)  
171

0001000100001001100001001010001010101000010000000000001010010001001000001000000101001001010100010010001000101 (1)  
172

00010001000000111000011010100010100010000000100000010001010000001010000001000000101001001000110000001000000010 (1)  
173

0001000100000011100000101010001010101000010100000001000101000000101000000101000010100000000010000001000000010 (1)  
174

0001000100001001100001001010001010101000010000000000001010010001001000001000000101001000000100010000001000101 (1)  
175

0001000100000011100001101010000010101000000100000010000010000000010000101001000000110010001000000010 (1)  
176

0001000100000011100000101010001010101000000100000010000010010000010000001000000101101000000110010000100000010 (1)  
177

0001000100000011100001101010000010101000000100000001000000010000010000001000000101001000000110010001000000010 (1)  
178

0001000100000011100001101010001010001000000010000001000101000000010000001010000101001000000110010001000000010 (1)  
179

0001000100000011100000101010001010001000000010000001000101001000100000000010000101001000000110010000100000011 (1)  
180

000100010000001110000010101000001010100000010000000100000100000001010000100001000000110010001000000010 (1)  
181

0001000110001001100001101010000010101000010000000000001010010001001000001000000101100000000100010000001000001 (1)  
182

0001000100000010100001101010000010101000010000000000001010010001001000001000000101100000000100010000001000001 (1)  
183

0001000100001001100001001010000010100000010000000000001010010001001000001000000101001000010100010000001000000 (1)  
184

0001000100001001100001001010000010000000001000000000100010100100000010000001000000100001000010000001000001 (1)  
185

00010001000000111000011010100010101010000001000000010001010000001010000001010000100000000000010010001100000001 (1)  
186

000110011000001010010000100000001000100001010000000000010000100000100000100101000000100010000001100001 (1)  
187

0001000100000011100000101010000010101000010100000001000001000000101000000000010010001000000010 (1)  
188

000110010000001010010000100000001010100001010000000000101000000001000101000000100101000000100010000001100001 (2)  
189 190

0001100100000010100100001010000010101000010100000000001010000001001000101000000100101000000100010000001100001 (2)  
191 198

0001000100000011100000101010000101010000001000000010001010010000010000001010000100001000000100010001000000010 (1)  
192

0001000100000011100000100010000010101000000100000001000101000000101000000101000101001000000010010001000000010 (1)  
193

000100010000001110000010001000010101010000001000000010000010010001000000000100001001010000000100100001000000010 (1)  
194

00010001000000111000001000100001010101000000100000001000001001000001000000101000101001000000100010001000000010 (1)  
195

00010001000000111000001000100001010101000000100000001000101001000001000000010000101001000000110010001000000011 (1)  
196

0001000100000011100000101010000010101000000100000001000101001000101000000010000100001000000110010001000000010 (1)  
197

0001100100000010100100001000000010101000010100000000001010000001001000100000000100101000000100010000001100001 (1)  
199

0001000100000011100000101010000010101000000100000001000101001000001000000101001000000110010001000000010 (1)  
200

000100010000001110000010101000001010100000010000000100000100000001000000100001000000110010001000000010 (1)  
201

000110011000001010010000101000001010100001010000000000101000000100100010100000010010100000010000000001100011 (1)  
202

0001100100000010100100001010000010101000010100000000001010000001001000101000000100101000000100010010001100010 (1)  
203

0001000100000011100000101010000101010000001000000010000010010000010000001010010000000100100001000000010 (1)  
204

0001000100000011100000101010000010101000000100000001000001001000001000000001001000000110010001000000010 (1)  
205

0001000100000011001001010100001101010000001000000010000010000001010000100001000010001000100000100 (1)  
206

000100011000001110010010101000101010000101000000010000010010000010000001010000101001000010010000001010000100 (1)  
207

00010000000000101001000010100010000001000000010000000010001010000001010000100001000000010000001010000100 (1)  
208

000100000000001010010010101000001000100000010000000100000100100000100000010100001000010000000000001010000100 (1)  
209

000100011000001110000010101000001000100000010000000100000100100001010000100001000010010010011010000110 (1)  
210

000100010000000110010010101000101000100001000000000000101000000100000001010000101001000000100000001000000110 (1)  
211

00010001000000011001001010100010100010000101000000000001010010000010000001010000101101000000100000001000000100 (1)  
212

00011001000000010100100001000000101010000101000000000001010000001001000101000000100101000000100010010001100010 (1)  
213

000110010000000101001000010000000101010000101000000000001010000001001000001000000100101000000100010000001100010 (1)  
214

000110010000000101001000010100000101010000101000000000001010000001001000101000000100101000000100010000001100010 (1)  
215

000010011000101010010000101000101010000100000000000001010000001001000101000000100001000000100010000001100010 (1)  
216

000110010000000101001000010000000101010000101000000000001010000001001000101000000100101000000100010000001100010 (1)  
217

00011001000000011001001010100010100010000100000000010000000010001000000001010000001011000010100010001000000010 (1)  
218

0001000110000001100100101010001010001000010100000000001000010001010000001010000101011000000100010001000000100 (1)  
219

000100010000000110010010101000101000100001000010000100000000001010000001010000101011000010100010001010000110 (1)  
220

000100011000000110010010101000001000100001000010000000001000010001010000001010000001101000000100000001000000010 (1)  
221

000110010000000101001000010100010101010000101000000000001010000001001000101000000100101000000100010000001100010 (1)  
222

000100001000000110010010101000101000100001000010000000001000010001010000001010000101101000000110010001010000010 (1)  
223

00010001000000011001001010100000100010000100001000000000100001000001010000101100001010100010001010000100 (1)  
224

00010000000000011001000010100010100010000100001000001000000101000000101000000100001100000000000100000000 (1)  
225

00010001000000011001001010100001100010000001000000000000010010000010000001010000001000010000100010001010000100 (1)  
226

000100010000000110010010101000101000100001000000000100010100100000100000010000001000010010010010001010000100 (1)  
227

0001000000000001100100001010000010001000010000000001000000000000100000010100001001000100000000001000000000 (1)  
228

010010010000010011000100010001010101000100010000000101000000110000100000010000000011100100010100000010100001010 (2)  
229 230

010010010000010011000100010001010101000100010000000100000000110000110000010000000011100100010100000010100001010 (1)  
231

01001001100010011000101010001010101000000000010100101000000110000100010010000000010000000110000000010100001000 (1)  
232

0100000010001001100001001000100001000000100001000000000100000100000000001000010000100010100000010110000010 (1)  
233

0100000110001001100001001000100001000100100000010000001000000100000100000000001000010000100010100000010110001010 (1)  
234

0000100110001001100000101000101010100010001000000010100000000000100010010000000011000100000110010010100001010 (1)  
235

01000001100010011010010010001000101000000000010000101000000110000100000000001000010000100010100000010110001010 (1)  
236

00001000100010011010010010001010101000000000001000010000000100001000100000010000100000000010010000010 (1)  
237

00001000100010011000010010001010101000000000001001010000001100001000100000000001100010010000000010110000010 (1)  
238

0000100010001001100001001000101010100010000001010010100000011000010001000000100001100010010000000010110000010 (1)  
239

0000100010001001100001001000101010000010000001010010100000011000010001000000000011000000100000010010110001000 (1)  
240

0000100010001001100001001000101010100010000001010010100000011000010001000000000011000100100000000110110001000 (1)  
241

0000100010001001100001001000101010100010000001010010100000011000010001000000000011000100100010010100001000 (1)  
242

000010001000100110000100100010101010001000000010010100000001000010001000000000011000100100010010100001000 (1)  
243

0000100010001001100001001000101010100000000000100101000000110000100010000001000011000100010010010110001000 (1)  
244

00100001000010011000010010001001000000100010000000100000010000011001000000100001100010010000000010010001000 (1)  
245

0000100010001001100001001000101010000010000001010010100000011000011000000000100001010010010000000000100001000 (1)  
246

00001001100010011000010010001010100000100000010100101000000010000110000000001000011100100100000000010110001000 (1)  
247

00001001100010011000000010001010100000100000000100101000000110000110010000001000011000100100000000110110001000 (1)  
248

00001000100000001000010010001010100000100000010100101000000010000110000000001000011000100100000000010100001000 (1)  
249

001010011000100110000000100010011010001000100000000100000010000010000010001000000000010000100100010010001000 (1)  
250

0100100010001001100001001000101010000010000001010010100000001000001001000000000011000100100000010010100001000 (1)  
**Genotype 251**

**C) Tot com SA = Total haplotypes for combined specific SSR alleles per population**

**Allele fragments: Specific alleles = 34 distributed in 6 populations (See Table 3)**

**Fragment patterns detected: 244 distributed in 6 populations** – the patterns with no fragments in the population are in red font

**Number of samples: 251**

**Population** SJ1  
**Traits** VIR, PO, FFB, HT, BW

| Genotype number | ID         | Specific alleles produced by SSRs |   |   |   |   |   |
|-----------------|------------|-----------------------------------|---|---|---|---|---|
|                 |            | 1                                 | 2 | 3 | 4 | 5 | 6 |
| 1               | SJ1_20/61  | 0                                 | 0 | 0 | 0 | 0 | 0 |
| 2               | SJ1_20/88  | 0                                 | 0 | 0 | 0 | 0 | 0 |
| 3               | SJ1_20/89  | 0                                 | 0 | 0 | 0 | 0 | 0 |
| 4               | SJ1_20/90  | 0                                 | 0 | 0 | 0 | 0 | 0 |
| 5               | SJ1_20/91  | 0                                 | 0 | 0 | 0 | 0 | 0 |
| 6               | SJ1_20/8   | 0                                 | 0 | 0 | 0 | 0 | 1 |
| 7               | SJ1_20/12  | 0                                 | 0 | 0 | 0 | 0 | 1 |
| 8               | SJ1_20/13  | 0                                 | 0 | 0 | 0 | 0 | 1 |
| 9               | SJ1_20/25  | 0                                 | 0 | 0 | 0 | 0 | 1 |
| 10              | SJ1_20/54  | 0                                 | 0 | 0 | 0 | 0 | 1 |
| 11              | SJ1_20/58  | 0                                 | 0 | 0 | 0 | 0 | 1 |
| 12              | SJ1_20/9   | 0                                 | 0 | 0 | 0 | 1 | 1 |
| 13              | SJ1_20/101 | 0                                 | 0 | 1 | 0 | 0 | 0 |
| 14              | SJ1_20/50  | 0                                 | 0 | 1 | 1 | 0 | 0 |
| 15              | SJ1_20/15  | 0                                 | 1 | 0 | 0 | 0 | 0 |
| 16              | SJ1_20/20  | 0                                 | 1 | 0 | 0 | 0 | 0 |
| 17              | SJ1_20/79  | 0                                 | 1 | 0 | 0 | 0 | 0 |
| 18              | SJ1_20/100 | 0                                 | 1 | 0 | 0 | 0 | 1 |
| 19              | SJ1_20/27  | 0                                 | 1 | 0 | 0 | 1 | 0 |
| 20              | SJ1_20/33  | 0                                 | 1 | 0 | 0 | 1 | 0 |
| 21              | SJ1_20/11  | 0                                 | 1 | 0 | 1 | 0 | 0 |
| 22              | SJ1_20/23  | 0                                 | 1 | 0 | 1 | 0 | 0 |
| 23              | SJ1_20/48  | 0                                 | 1 | 0 | 1 | 0 | 0 |
| 24              | SJ1_20/92  | 0                                 | 1 | 0 | 1 | 0 | 0 |
| 25              | SJ1_20/105 | 0                                 | 1 | 0 | 1 | 0 | 0 |
| 26              | SJ1_20/62  | 0                                 | 1 | 1 | 0 | 0 | 0 |
| 27              | SJ1_20/59  | 0                                 | 1 | 1 | 1 | 0 | 0 |
| 28              | SJ1_20/77  | 0                                 | 1 | 1 | 1 | 0 | 0 |
| 29              | SJ1_20/80  | 0                                 | 1 | 1 | 1 | 0 | 0 |
| 30              | SJ1_20/81  | 0                                 | 1 | 1 | 1 | 0 | 0 |
| 31              | SJ1_20/56  | 1                                 | 0 | 0 | 0 | 0 | 0 |
| 32              | SJ1_20/31  | 1                                 | 0 | 0 | 0 | 0 | 1 |



|    |            |   |   |   |   |   |   |
|----|------------|---|---|---|---|---|---|
| 33 | SJ1_20/43  | 1 | 0 | 0 | 0 | 0 | 1 |
| 34 | SJ1_20/97  | 1 | 0 | 0 | 1 | 0 | 0 |
| 35 | SJ1_20/70  | 1 | 0 | 1 | 1 | 0 | 0 |
| 36 | SJ1_20/103 | 1 | 0 | 1 | 1 | 1 | 0 |
| 37 | SJ1_20/29  | 1 | 1 | 0 | 0 | 0 | 0 |
| 38 | SJ1_20/35  | 1 | 1 | 0 | 0 | 0 | 0 |
| 39 | SJ1_20/68  | 1 | 1 | 0 | 0 | 0 | 0 |
| 40 | SJ1_20/102 | 1 | 1 | 0 | 0 | 1 | 0 |
| 41 | SJ1_20/3   | 1 | 1 | 0 | 1 | 0 | 0 |
| 42 | SJ1_20/45  | 1 | 1 | 0 | 1 | 0 | 0 |
| 43 | SJ1_20/67  | 1 | 1 | 0 | 1 | 0 | 0 |
| 44 | SJ1_20/71  | 1 | 1 | 0 | 1 | 0 | 0 |
| 45 | SJ1_20/72  | 1 | 1 | 0 | 1 | 0 | 0 |
| 46 | SJ1_20/76  | 1 | 1 | 0 | 1 | 0 | 0 |
| 47 | SJ1_20/84  | 1 | 1 | 0 | 1 | 0 | 0 |
| 48 | SJ1_19/2   | 1 | 1 | 0 | 1 | 1 | 0 |
| 49 | SJ1_20/95  | 1 | 1 | 1 | 0 | 0 | 0 |
| 50 | SJ1_20/98  | 1 | 1 | 1 | 0 | 0 | 0 |
| 51 | SJ1_20/106 | 1 | 1 | 1 | 0 | 0 | 0 |
| 52 | SJ1_20/85  | 1 | 1 | 1 | 1 | 0 | 0 |

Haplotypes: 52 - 5 = 47

Population SJ2

Traits FL,HT,FFB

| Genotype number | ID        | Specific alleles produced by SSRs |   |   |   |   |   |
|-----------------|-----------|-----------------------------------|---|---|---|---|---|
|                 |           | 1                                 | 2 | 3 | 4 | 5 | 6 |
| 53              | SJ2_4/17  | 0                                 | 0 | 0 | 0 | 0 | 0 |
| 54              | SJ2_4/38  | 0                                 | 0 | 0 | 0 | 0 | 1 |
| 55              | SJ2_4/44  | 0                                 | 0 | 0 | 0 | 0 | 1 |
| 56              | SJ2_4/49  | 0                                 | 0 | 0 | 0 | 0 | 1 |
| 57              | SJ2_4/50  | 0                                 | 0 | 0 | 0 | 0 | 1 |
| 58              | SJ2_4/56  | 0                                 | 0 | 0 | 0 | 0 | 1 |
| 59              | SJ2_4/72  | 0                                 | 0 | 0 | 0 | 0 | 1 |
| 60              | SJ2_4/74  | 0                                 | 0 | 0 | 0 | 0 | 1 |
| 61              | SJ2_4/76  | 0                                 | 0 | 0 | 0 | 0 | 1 |
| 62              | SJ2_4/89  | 0                                 | 0 | 0 | 0 | 0 | 1 |
| 63              | SJ2_4/91  | 0                                 | 0 | 0 | 0 | 0 | 1 |
| 64              | SJ2_4/112 | 0                                 | 0 | 0 | 0 | 0 | 1 |
| 65              | SJ2_4/122 | 0                                 | 0 | 0 | 0 | 1 | 0 |
| 66              | SJ2_4/126 | 0                                 | 0 | 0 | 0 | 1 | 0 |
| 67              | SJ2_4/132 | 0                                 | 0 | 0 | 0 | 1 | 1 |
| 68              | SJ2_7/5   | 0                                 | 0 | 0 | 0 | 1 | 1 |
| 69              | SJ2_7/8   | 0                                 | 0 | 0 | 0 | 1 | 1 |
| 70              | SJ2_7/34  | 0                                 | 0 | 0 | 0 | 1 | 1 |

|     |            |   |   |   |   |   |   |
|-----|------------|---|---|---|---|---|---|
| 71  | SJ2_7/42   | 0 | 0 | 0 | 0 | 1 | 1 |
| 72  | SJ2_7/54   | 0 | 0 | 0 | 0 | 1 | 1 |
| 73  | SJ2_7/67   | 0 | 0 | 0 | 1 | 0 | 0 |
| 74  | SJ2_7/72   | 0 | 0 | 0 | 1 | 0 | 1 |
| 75  | SJ2_7/77   | 0 | 0 | 0 | 1 | 0 | 1 |
| 76  | SJ2_21/22  | 0 | 0 | 0 | 1 | 0 | 1 |
| 77  | SJ2_21/38  | 0 | 0 | 0 | 1 | 0 | 1 |
| 78  | SJ2_21/42  | 0 | 0 | 0 | 1 | 1 | 0 |
| 79  | SJ2_21/44  | 0 | 0 | 0 | 1 | 1 | 1 |
| 80  | SJ2_21/45  | 0 | 0 | 0 | 1 | 1 | 1 |
| 81  | SJ2_21/52  | 0 | 0 | 0 | 1 | 1 | 1 |
| 82  | SJ2_21/64  | 0 | 0 | 0 | 1 | 1 | 1 |
| 83  | SJ2_21/65  | 0 | 0 | 1 | 0 | 0 | 0 |
| 84  | SJ2_21/73  | 0 | 0 | 1 | 0 | 0 | 1 |
| 85  | SJ2_21/75  | 0 | 0 | 1 | 0 | 1 | 1 |
| 86  | SJ2_21/92  | 0 | 1 | 0 | 0 | 0 | 1 |
| 87  | SJ2_21/95  | 0 | 1 | 0 | 0 | 1 | 1 |
| 88  | SJ2_21/110 | 0 | 1 | 0 | 0 | 1 | 1 |
| 89  | SJ2_21/119 | 0 | 1 | 0 | 1 | 0 | 0 |
| 90  | SJ2_21/136 | 0 | 1 | 0 | 1 | 0 | 1 |
| 91  | SJ2_21/146 | 0 | 1 | 0 | 1 | 0 | 1 |
| 92  | SJ2_21/166 | 0 | 1 | 0 | 1 | 0 | 1 |
| 93  | SJ2_21/170 | 0 | 1 | 0 | 1 | 0 | 1 |
| 94  | SJ2_21/171 | 0 | 1 | 0 | 1 | 1 | 1 |
| 95  | SJ2_21/175 | 0 | 1 | 0 | 1 | 1 | 1 |
| 96  | SJ2_21/186 | 0 | 1 | 0 | 1 | 1 | 1 |
| 97  | SJ2_21/189 | 0 | 1 | 1 | 0 | 0 | 1 |
| 98  | SJ2_21/191 | 0 | 1 | 1 | 0 | 0 | 1 |
| 99  | SJ2_21/193 | 0 | 1 | 1 | 1 | 1 | 1 |
| 100 | SJ2_21/203 | 1 | 0 | 0 | 0 | 1 | 0 |
| 101 | SJ2_21/207 | 1 | 0 | 0 | 1 | 0 | 1 |
| 102 | SJ2_21/209 | 1 | 0 | 1 | 0 | 1 | 1 |

**Haplotypes: 50 - 1 = 49**

**Population** SJ3

**Traits** BN, FFB

| Genotype number | ID         | <u>Specific alleles produced by SSRs</u> |   |   |   |   |
|-----------------|------------|------------------------------------------|---|---|---|---|
|                 |            | 1                                        | 2 | 3 | 4 | 5 |
| 103             | SJ3_15/43  | 0                                        | 0 | 0 | 0 | 0 |
| 104             | SJ3_1/25   | 0                                        | 0 | 0 | 1 | 0 |
| 105             | SJ3_1/26   | 0                                        | 0 | 0 | 1 | 0 |
| 106             | SJ3_15/152 | 0                                        | 0 | 1 | 1 | 1 |
| 107             | SJ3_1/60   | 0                                        | 1 | 0 | 0 | 0 |
| 108             | SJ3_14/7   | 0                                        | 1 | 0 | 0 | 0 |

|     |            |   |   |   |   |   |
|-----|------------|---|---|---|---|---|
| 109 | SJ3_14/49  | 0 | 1 | 0 | 0 | 0 |
| 110 | SJ3_49/22  | 0 | 1 | 0 | 0 | 1 |
| 111 | SJ3_49/74  | 0 | 1 | 0 | 0 | 1 |
| 112 | SJ3_49/85  | 0 | 1 | 0 | 0 | 1 |
| 113 | SJ3_49/94  | 0 | 1 | 0 | 0 | 1 |
| 114 | SJ3_1/27   | 0 | 1 | 0 | 1 | 0 |
| 115 | SJ3_15/98  | 0 | 1 | 0 | 1 | 0 |
| 116 | SJ3_15/164 | 0 | 1 | 0 | 1 | 1 |
| 117 | SJ3_49/23  | 0 | 1 | 0 | 1 | 1 |
| 118 | SJ3_49/80  | 0 | 1 | 0 | 1 | 1 |
| 119 | SJ3_49/95  | 0 | 1 | 0 | 1 | 1 |
| 120 | SJ3_49/146 | 0 | 1 | 0 | 1 | 1 |
| 121 | SJ3_49/198 | 0 | 1 | 0 | 1 | 1 |
| 122 | SJ3_1/17   | 0 | 1 | 1 | 0 | 0 |
| 123 | SJ3_1/19   | 0 | 1 | 1 | 1 | 0 |
| 124 | SJ3_1/24   | 0 | 1 | 1 | 1 | 0 |
| 125 | SJ3_1/31   | 0 | 1 | 1 | 1 | 0 |
| 126 | SJ3_15/159 | 0 | 1 | 1 | 1 | 1 |
| 127 | SJ3_15/11  | 1 | 0 | 0 | 0 | 1 |
| 128 | SJ3_15/111 | 1 | 0 | 0 | 1 | 0 |
| 129 | SJ3_15/127 | 1 | 0 | 0 | 1 | 0 |
| 130 | SJ3_15/131 | 1 | 0 | 0 | 1 | 0 |
| 131 | SJ3_15/87  | 1 | 0 | 1 | 1 | 0 |
| 132 | SJ3_1/29   | 1 | 1 | 0 | 0 | 0 |
| 133 | SJ3_1/39   | 1 | 1 | 0 | 0 | 0 |
| 134 | SJ3_1/40   | 1 | 1 | 0 | 0 | 0 |
| 135 | SJ3_1/41   | 1 | 1 | 0 | 0 | 0 |
| 136 | SJ3_1/50   | 1 | 1 | 0 | 0 | 0 |
| 137 | SJ3_1/57   | 1 | 1 | 0 | 0 | 0 |
| 138 | SJ3_14/12  | 1 | 1 | 0 | 0 | 0 |
| 139 | SJ3_14/15  | 1 | 1 | 0 | 0 | 0 |
| 140 | SJ3_14/20  | 1 | 1 | 0 | 0 | 0 |
| 141 | SJ3_14/21  | 1 | 1 | 0 | 0 | 0 |
| 142 | SJ3_14/42  | 1 | 1 | 0 | 0 | 0 |
| 143 | SJ3_14/43  | 1 | 1 | 0 | 0 | 0 |
| 144 | SJ3_14/51  | 1 | 1 | 0 | 0 | 0 |
| 145 | SJ3_49/237 | 1 | 1 | 0 | 0 | 1 |
| 146 | SJ3_14/58  | 1 | 1 | 0 | 1 | 0 |
| 147 | SJ3_15/179 | 1 | 1 | 0 | 1 | 1 |
| 148 | SJ3_1/12   | 1 | 1 | 1 | 0 | 0 |
| 149 | SJ3_14/62  | 1 | 1 | 1 | 0 | 0 |
| 150 | SJ3_1/22   | 1 | 1 | 1 | 0 | 1 |
| 151 | SJ3_1/32   | 1 | 1 | 1 | 1 | 0 |
| 152 | SJ3_1/53   | 1 | 1 | 1 | 1 | 0 |

---

**Haplotypes: 50 - 1 = 49**

**Population** SJ4  
**Traits** Drought, M/F  
 BW

| Genotype number | ID        | Specific alleles produced by SSRs |   |   |   |
|-----------------|-----------|-----------------------------------|---|---|---|
|                 |           | 1                                 | 2 | 3 | 4 |
| 153             | SJ4_24/1  | 0                                 | 1 | 0 | 0 |
| 154             | SJ4_24/2  | 0                                 | 1 | 0 | 0 |
| 155             | SJ4_24/4  | 0                                 | 1 | 0 | 0 |
| 156             | SJ4_24/5  | 0                                 | 1 | 0 | 0 |
| 157             | SJ4_24/7  | 0                                 | 1 | 0 | 0 |
| 158             | SJ4_24/9  | 1                                 | 1 | 0 | 0 |
| 159             | SJ4_24/13 | 1                                 | 1 | 0 | 0 |
| 160             | SJ4_24/15 | 1                                 | 1 | 0 | 0 |
| 161             | SJ4_24/18 | 1                                 | 1 | 0 | 0 |
| 162             | SJ4_24/20 | 1                                 | 1 | 0 | 0 |
| 163             | SJ4_24/21 | 1                                 | 1 | 0 | 0 |
| 164             | SJ4_24/23 | 1                                 | 1 | 0 | 0 |
| 165             | SJ4_24/25 | 1                                 | 1 | 1 | 0 |
| 166             | SJ4_24/26 | 1                                 | 1 | 1 | 0 |
| 167             | SJ4_24/27 | 1                                 | 1 | 1 | 0 |
| 168             | SJ4_24/28 | 1                                 | 1 | 1 | 0 |
| 169             | SJ4_24/29 | 1                                 | 1 | 1 | 0 |
| 170             | SJ4_24/31 | 1                                 | 1 | 1 | 0 |
| 171             | SJ4_28/5  | 1                                 | 1 | 1 | 1 |

**Haplotypes: 19**

**Population** SJ5  
**Traits** SF, IER,  
 FL

| Genotype number | ID       | Specific alleles produced by SSRs |   |   |   |   |
|-----------------|----------|-----------------------------------|---|---|---|---|
|                 |          | 1                                 | 2 | 3 | 4 | 5 |
| 172             | SJ5_5/54 | 0                                 | 1 | 1 | 0 | 1 |
| 173             | SJ5_5/8  | 0                                 | 1 | 1 | 1 | 0 |
| 174             | SJ5_5/37 | 0                                 | 1 | 1 | 1 | 0 |
| 175             | SJ5_5/45 | 0                                 | 1 | 1 | 1 | 0 |
| 176             | SJ5_5/15 | 0                                 | 1 | 1 | 1 | 1 |
| 177             | SJ5_5/48 | 0                                 | 1 | 1 | 1 | 1 |
| 178             | SJ5_5/50 | 0                                 | 1 | 1 | 1 | 1 |
| 179             | SJ5_5/34 | 1                                 | 0 | 1 | 0 | 1 |
| 180             | SJ5_6/47 | 1                                 | 0 | 1 | 0 | 1 |
| 181             | SJ5_6/53 | 1                                 | 0 | 1 | 0 | 1 |
| 182             | SJ5_6/56 | 1                                 | 0 | 1 | 0 | 1 |
| 183             | SJ5_6/59 | 1                                 | 0 | 1 | 0 | 1 |
| 184             | SJ5_5/13 | 1                                 | 0 | 1 | 1 | 0 |

|     |          |   |   |   |   |   |
|-----|----------|---|---|---|---|---|
| 185 | SJ5_6/5  | 1 | 0 | 1 | 1 | 0 |
| 186 | SJ5_6/46 | 1 | 0 | 1 | 1 | 0 |
| 187 | SJ5_6/52 | 1 | 0 | 1 | 1 | 0 |
| 188 | SJ5_6/64 | 1 | 0 | 1 | 1 | 0 |
| 189 | SJ5_6/44 | 1 | 1 | 0 | 0 | 1 |
| 190 | SJ5_6/61 | 1 | 1 | 1 | 0 | 0 |
| 191 | SJ5_5/3  | 1 | 1 | 1 | 0 | 1 |
| 192 | SJ5_5/7  | 1 | 1 | 1 | 0 | 1 |
| 193 | SJ5_5/25 | 1 | 1 | 1 | 0 | 1 |
| 194 | SJ5_5/26 | 1 | 1 | 1 | 0 | 1 |
| 195 | SJ5_5/27 | 1 | 1 | 1 | 0 | 1 |
| 196 | SJ5_5/38 | 1 | 1 | 1 | 0 | 1 |
| 197 | SJ5_5/40 | 1 | 1 | 1 | 0 | 1 |
| 198 | SJ5_5/41 | 1 | 1 | 1 | 0 | 1 |
| 199 | SJ5_5/53 | 1 | 1 | 1 | 0 | 1 |
| 200 | SJ5_5/60 | 1 | 1 | 1 | 0 | 1 |
| 201 | SJ5_5/62 | 1 | 1 | 1 | 0 | 1 |
| 202 | SJ5_6/27 | 1 | 1 | 1 | 0 | 1 |
| 203 | SJ5_6/29 | 1 | 1 | 1 | 0 | 1 |
| 204 | SJ5_6/31 | 1 | 1 | 1 | 0 | 1 |
| 205 | SJ5_6/36 | 1 | 1 | 1 | 0 | 1 |
| 206 | SJ5_6/38 | 1 | 1 | 1 | 0 | 1 |
| 207 | SJ5_6/45 | 1 | 1 | 1 | 0 | 1 |
| 208 | SJ5_6/55 | 1 | 1 | 1 | 0 | 1 |
| 209 | SJ5_5/10 | 1 | 1 | 1 | 1 | 0 |
| 210 | SJ5_5/16 | 1 | 1 | 1 | 1 | 0 |
| 211 | SJ5_5/46 | 1 | 1 | 1 | 1 | 0 |
| 212 | SJ5_5/59 | 1 | 1 | 1 | 1 | 0 |
| 213 | SJ5_5/63 | 1 | 1 | 1 | 1 | 0 |
| 214 | SJ5_5/64 | 1 | 1 | 1 | 1 | 0 |
| 215 | SJ5_6/1  | 1 | 1 | 1 | 1 | 0 |
| 216 | SJ5_6/2  | 1 | 1 | 1 | 1 | 0 |
| 217 | SJ5_6/24 | 1 | 1 | 1 | 1 | 0 |
| 218 | SJ5_6/25 | 1 | 1 | 1 | 1 | 0 |
| 219 | SJ5_6/60 | 1 | 1 | 1 | 1 | 0 |
| 220 | SJ5_5/4  | 1 | 1 | 1 | 1 | 1 |
| 221 | SJ5_5/6  | 1 | 1 | 1 | 1 | 1 |
| 222 | SJ5_5/14 | 1 | 1 | 1 | 1 | 1 |
| 223 | SJ5_5/30 | 1 | 1 | 1 | 1 | 1 |
| 224 | SJ5_5/33 | 1 | 1 | 1 | 1 | 1 |
| 225 | SJ5_5/42 | 1 | 1 | 1 | 1 | 1 |
| 226 | SJ5_5/43 | 1 | 1 | 1 | 1 | 1 |
| 227 | SJ5_5/58 | 1 | 1 | 1 | 1 | 1 |
| 228 | SJ5_6/62 | 1 | 1 | 1 | 1 | 1 |

---

**Haplotypes: 57**

**Population** SJ6  
**Traits** OB, OM,  
 FL

| Genotype number | ID        | Specific alleles produced by SSRs |   |   |   |   |
|-----------------|-----------|-----------------------------------|---|---|---|---|
|                 |           | 1                                 | 2 | 3 | 4 | 5 |
| 229             | SJ6_56/99 | 0                                 | 0 | 0 | 0 | 1 |
| 230             | SJ6_56/30 | 0                                 | 1 | 0 | 0 | 0 |
| 231             | SJ6_56/43 | 0                                 | 1 | 0 | 0 | 1 |
| 232             | SJ6_56/59 | 0                                 | 1 | 0 | 0 | 1 |
| 233             | SJ6_56/60 | 0                                 | 1 | 0 | 0 | 1 |
| 234             | SJ6_56/65 | 0                                 | 1 | 0 | 0 | 1 |
| 235             | SJ6_52/13 | 0                                 | 1 | 0 | 1 | 0 |
| 236             | SJ6_56/17 | 0                                 | 1 | 0 | 1 | 0 |
| 237             | SJ6_56/75 | 0                                 | 1 | 0 | 1 | 0 |
| 238             | SJ6_52/4  | 0                                 | 1 | 0 | 1 | 1 |
| 239             | SJ6_56/36 | 0                                 | 1 | 0 | 1 | 1 |
| 240             | SJ6_56/88 | 0                                 | 1 | 0 | 1 | 1 |
| 241             | SJ6_56/92 | 0                                 | 1 | 0 | 1 | 1 |
| 242             | SJ6_56/94 | 0                                 | 1 | 0 | 1 | 1 |
| 243             | SJ6_56/97 | 0                                 | 1 | 0 | 1 | 1 |
| 244             | SJ6_48/52 | 0                                 | 1 | 1 | 0 | 0 |
| 245             | SJ6_56/98 | 1                                 | 1 | 0 | 0 | 1 |
| 246             | SJ6_52/5  | 1                                 | 1 | 0 | 1 | 1 |
| 247             | SJ6_56/83 | 1                                 | 1 | 0 | 1 | 1 |
| 248             | SJ6_48/5  | 1                                 | 1 | 1 | 0 | 1 |
| 249             | SJ6_48/7  | 1                                 | 1 | 1 | 0 | 1 |
| 250             | SJ6_48/49 | 1                                 | 1 | 1 | 0 | 1 |
| 251             | SJ6_52/9  | 1                                 | 1 | 1 | 0 | 1 |

**Haplotypes: 23 \*In this case, with 5 out of 8 fragments distinguish all GTs of SJ6**
